# Supplementary material for: Selective Pressure and Evolution of SARS-CoV-2 Lineages BF.7 and BQ.1.1 Circulating in Italy from July to December 2022
Source: MDPI journal article supplement (doi:10.3390/microorganisms12050908), 2024-04-30
Supplement: s1 [file s1]

Table S1. a) GISAID Accession Numbers of SARS-CoV-2 genomes belonging to BF.7 lineage (first dataset)

|                  |                  |                  |                  |
|------------------|------------------|------------------|------------------|
| EPI_ISL_13740570 | EPI_ISL_14995693 | EPI_ISL_15252685 | EPI_ISL_15368172 |
| EPI_ISL_14200641 | EPI_ISL_14995709 | EPI_ISL_15252671 | EPI_ISL_15368157 |
| EPI_ISL_14570455 | EPI_ISL_14995711 | EPI_ISL_15252651 | EPI_ISL_15368139 |
| EPI_ISL_14386927 | EPI_ISL_14995688 | EPI_ISL_15283109 | EPI_ISL_15368111 |
| EPI_ISL_14386715 | EPI_ISL_15019992 | EPI_ISL_15282944 | EPI_ISL_15368112 |
| EPI_ISL_14357120 | EPI_ISL_15019986 | EPI_ISL_15282847 | EPI_ISL_15343658 |
| EPI_ISL_14390379 | EPI_ISL_15019984 | EPI_ISL_15282752 | EPI_ISL_15343657 |
| EPI_ISL_14390365 | EPI_ISL_15019976 | EPI_ISL_15282704 | EPI_ISL_15329656 |
| EPI_ISL_14390350 | EPI_ISL_15233268 | EPI_ISL_15282671 | EPI_ISL_15330016 |
| EPI_ISL_14390108 | EPI_ISL_15247599 | EPI_ISL_15282610 | EPI_ISL_15505227 |
| EPI_ISL_14393480 | EPI_ISL_15022816 | EPI_ISL_15284304 | EPI_ISL_15505211 |
| EPI_ISL_14393511 | EPI_ISL_15056590 | EPI_ISL_15383386 | EPI_ISL_15333945 |
| EPI_ISL_14474711 | EPI_ISL_15069377 | EPI_ISL_15383370 | EPI_ISL_15333948 |
| EPI_ISL_14493888 | EPI_ISL_15069373 | EPI_ISL_15292630 | EPI_ISL_15388728 |
| EPI_ISL_14493887 | EPI_ISL_15083840 | EPI_ISL_15292647 | EPI_ISL_15350185 |
| EPI_ISL_14542230 | EPI_ISL_15083845 | EPI_ISL_15292648 | EPI_ISL_15350178 |
| EPI_ISL_14542091 | EPI_ISL_15084123 | EPI_ISL_15292653 | EPI_ISL_15350173 |
| EPI_ISL_14549724 | EPI_ISL_15084069 | EPI_ISL_15292654 | EPI_ISL_15350151 |
| EPI_ISL_14932009 | EPI_ISL_15099090 | EPI_ISL_15292660 | EPI_ISL_15350138 |
| EPI_ISL_14855045 | EPI_ISL_15099084 | EPI_ISL_15292662 | EPI_ISL_15350119 |
| EPI_ISL_14798120 | EPI_ISL_15102714 | EPI_ISL_15292663 | EPI_ISL_15350116 |
| EPI_ISL_14786130 | EPI_ISL_15102671 | EPI_ISL_15292666 | EPI_ISL_15350118 |
| EPI_ISL_14815390 | EPI_ISL_15247533 | EPI_ISL_15292671 | EPI_ISL_15351976 |
| EPI_ISL_14887905 | EPI_ISL_15247525 | EPI_ISL_15303260 | EPI_ISL_15362987 |
| EPI_ISL_14913920 | EPI_ISL_15112675 | EPI_ISL_15512690 | EPI_ISL_15350917 |
| EPI_ISL_14913915 | EPI_ISL_15112661 | EPI_ISL_15512697 | EPI_ISL_15350923 |
| EPI_ISL_14980662 | EPI_ISL_15154250 | EPI_ISL_15512706 | EPI_ISL_15350924 |
| EPI_ISL_14924698 | EPI_ISL_15157684 | EPI_ISL_15512689 | EPI_ISL_15350925 |
| EPI_ISL_14922309 | EPI_ISL_15188070 | EPI_ISL_15512711 | EPI_ISL_15362818 |
| EPI_ISL_14922312 | EPI_ISL_15188071 | EPI_ISL_15512707 | EPI_ISL_15362806 |
| EPI_ISL_14922313 | EPI_ISL_15188079 | EPI_ISL_15512703 | EPI_ISL_15362803 |
| EPI_ISL_14922317 | EPI_ISL_15247406 | EPI_ISL_15388789 | EPI_ISL_15362788 |
| EPI_ISL_15363750 | EPI_ISL_15247400 | EPI_ISL_15388761 | EPI_ISL_15362764 |
| EPI_ISL_15363741 | EPI_ISL_15192673 | EPI_ISL_15306898 | EPI_ISL_15362711 |
| EPI_ISL_15363732 | EPI_ISL_15192680 | EPI_ISL_15315933 | EPI_ISL_15363549 |
| EPI_ISL_15363728 | EPI_ISL_15192683 | EPI_ISL_15315930 | EPI_ISL_15363527 |
| EPI_ISL_14971404 | EPI_ISL_15192701 | EPI_ISL_15315924 | EPI_ISL_15363522 |
| EPI_ISL_14971348 | EPI_ISL_15192706 | EPI_ISL_15368313 | EPI_ISL_15364995 |
| EPI_ISL_14971326 | EPI_ISL_15208731 | EPI_ISL_15368296 | EPI_ISL_15364975 |
| EPI_ISL_14992409 | EPI_ISL_15208725 | EPI_ISL_15368298 | EPI_ISL_15364968 |
| EPI_ISL_14992396 | EPI_ISL_15220979 | EPI_ISL_15368201 | EPI_ISL_15364953 |
| EPI_ISL_14991655 | EPI_ISL_15247339 | EPI_ISL_15368182 | EPI_ISL_15364947 |
| EPI_ISL_14994383 | EPI_ISL_15247337 | EPI_ISL_15368161 | EPI_ISL_15364895 |

|                  |                  |                  |                  |
|------------------|------------------|------------------|------------------|
| EPI_ISL_15364883 | EPI_ISL_15436118 | EPI_ISL_15493874 | EPI_ISL_15636850 |
| EPI_ISL_15364885 | EPI_ISL_15436123 | EPI_ISL_15494288 | EPI_ISL_15754190 |
| EPI_ISL_15364882 | EPI_ISL_15436144 | EPI_ISL_15494280 | EPI_ISL_15656064 |
| EPI_ISL_15364881 | EPI_ISL_15436147 | EPI_ISL_15630403 | EPI_ISL_15656062 |
| EPI_ISL_15364880 | EPI_ISL_15436148 | EPI_ISL_15630393 | EPI_ISL_15656060 |
| EPI_ISL_15364877 | EPI_ISL_15436149 | EPI_ISL_15630387 | EPI_ISL_15656048 |
| EPI_ISL_15364878 | EPI_ISL_15436152 | EPI_ISL_15537461 | EPI_ISL_15656050 |
| EPI_ISL_15364879 | EPI_ISL_15436155 | EPI_ISL_15537183 | EPI_ISL_15656042 |
| EPI_ISL_15364876 | EPI_ISL_15195486 | EPI_ISL_15537190 | EPI_ISL_15656039 |
| EPI_ISL_15364875 | EPI_ISL_15427026 | EPI_ISL_15537197 | EPI_ISL_15656038 |
| EPI_ISL_15364874 | EPI_ISL_15427047 | EPI_ISL_15537201 | EPI_ISL_15656036 |
| EPI_ISL_15364868 | EPI_ISL_15427067 | EPI_ISL_15537203 | EPI_ISL_15656034 |
| EPI_ISL_15364867 | EPI_ISL_15427144 | EPI_ISL_15537208 | EPI_ISL_15661812 |
| EPI_ISL_15364866 | EPI_ISL_15427273 | EPI_ISL_15537209 | EPI_ISL_15661818 |
| EPI_ISL_15365032 | EPI_ISL_15427274 | EPI_ISL_15537211 | EPI_ISL_15661822 |
| EPI_ISL_15365029 | EPI_ISL_15427299 | EPI_ISL_15537215 | EPI_ISL_15661824 |
| EPI_ISL_15365015 | EPI_ISL_15427300 | EPI_ISL_15541887 | EPI_ISL_15661834 |
| EPI_ISL_15366500 | EPI_ISL_15470001 | EPI_ISL_15541892 | EPI_ISL_15661842 |
| EPI_ISL_15367171 | EPI_ISL_15470003 | EPI_ISL_15541886 | EPI_ISL_15661846 |
| EPI_ISL_15364802 | EPI_ISL_15470004 | EPI_ISL_15541884 | EPI_ISL_15661849 |
| EPI_ISL_15364804 | EPI_ISL_15509781 | EPI_ISL_15541880 | EPI_ISL_15661852 |
| EPI_ISL_15364808 | EPI_ISL_15509776 | EPI_ISL_15541877 | EPI_ISL_15661855 |
| EPI_ISL_15364823 | EPI_ISL_15479411 | EPI_ISL_15541760 | EPI_ISL_15665402 |
| EPI_ISL_15367208 | EPI_ISL_15479408 | EPI_ISL_15541756 | EPI_ISL_15665396 |
| EPI_ISL_15367197 | EPI_ISL_15479402 | EPI_ISL_15630352 | EPI_ISL_15665395 |
| EPI_ISL_15368244 | EPI_ISL_15482145 | EPI_ISL_15630349 | EPI_ISL_15665394 |
| EPI_ISL_15368229 | EPI_ISL_15482143 | EPI_ISL_15630343 | EPI_ISL_15668556 |
| EPI_ISL_15368216 | EPI_ISL_15482135 | EPI_ISL_15630337 | EPI_ISL_15720520 |
| EPI_ISL_15388702 | EPI_ISL_15482133 | EPI_ISL_15630331 | EPI_ISL_15720518 |
| EPI_ISL_15388693 | EPI_ISL_15482130 | EPI_ISL_15630332 | EPI_ISL_15720509 |
| EPI_ISL_15418159 | EPI_ISL_15482119 | EPI_ISL_15612030 | EPI_ISL_15682647 |
| EPI_ISL_15418148 | EPI_ISL_15482111 | EPI_ISL_15611867 | EPI_ISL_15720500 |
| EPI_ISL_15418138 | EPI_ISL_15482108 | EPI_ISL_15611860 | EPI_ISL_15720496 |
| EPI_ISL_15422156 | EPI_ISL_15581746 | EPI_ISL_15545075 | EPI_ISL_15720490 |
| EPI_ISL_15422133 | EPI_ISL_15581744 | EPI_ISL_15545090 | EPI_ISL_15720473 |
| EPI_ISL_15422132 | EPI_ISL_15581733 | EPI_ISL_15545100 | EPI_ISL_15697161 |
| EPI_ISL_15422128 | EPI_ISL_15581728 | EPI_ISL_15581166 | EPI_ISL_15697159 |
| EPI_ISL_15422134 | EPI_ISL_15581718 | EPI_ISL_15581158 | EPI_ISL_15697156 |
| EPI_ISL_15422127 | EPI_ISL_15493895 | EPI_ISL_15630317 | EPI_ISL_15697150 |
| EPI_ISL_15422129 | EPI_ISL_15493891 | EPI_ISL_15630326 | EPI_ISL_15697143 |
| EPI_ISL_15422119 | EPI_ISL_15493884 | EPI_ISL_15630305 | EPI_ISL_15697140 |
| EPI_ISL_15509829 | EPI_ISL_15493879 | EPI_ISL_15636856 | EPI_ISL_15697139 |
| EPI_ISL_15509814 | EPI_ISL_15493875 | EPI_ISL_15636855 | EPI_ISL_15697129 |

|                  |                  |                  |                  |
|------------------|------------------|------------------|------------------|
| EPI_ISL_15697133 | EPI_ISL_15769846 | EPI_ISL_15790718 | EPI_ISL_15855217 |
| EPI_ISL_15697126 | EPI_ISL_15769709 | EPI_ISL_15790719 | EPI_ISL_15997747 |
| EPI_ISL_15722049 | EPI_ISL_15769705 | EPI_ISL_15790715 | EPI_ISL_15997741 |
| EPI_ISL_15731118 | EPI_ISL_15769695 | EPI_ISL_15803226 | EPI_ISL_15997743 |
| EPI_ISL_15731115 | EPI_ISL_15769692 | EPI_ISL_15803218 | EPI_ISL_15997722 |
| EPI_ISL_15731108 | EPI_ISL_15790617 | EPI_ISL_15803217 | EPI_ISL_15877711 |
| EPI_ISL_15731099 | EPI_ISL_15971238 | EPI_ISL_15803206 | EPI_ISL_15877712 |
| EPI_ISL_15743861 | EPI_ISL_15971242 | EPI_ISL_15803202 | EPI_ISL_15898883 |
| EPI_ISL_15754175 | EPI_ISL_15800507 | EPI_ISL_15833151 | EPI_ISL_15898857 |
| EPI_ISL_15754155 | EPI_ISL_15800491 | EPI_ISL_15833125 | EPI_ISL_15898850 |
| EPI_ISL_15750047 | EPI_ISL_15800489 | EPI_ISL_15801506 | EPI_ISL_15898831 |
| EPI_ISL_15750048 | EPI_ISL_15800480 | EPI_ISL_15801507 | EPI_ISL_15898796 |
| EPI_ISL_15750053 | EPI_ISL_15800476 | EPI_ISL_15992133 | EPI_ISL_15898794 |
| EPI_ISL_15750057 | EPI_ISL_15970966 | EPI_ISL_15808973 | EPI_ISL_15898793 |
| EPI_ISL_15750058 | EPI_ISL_15970971 | EPI_ISL_15808975 | EPI_ISL_15898778 |
| EPI_ISL_15750059 | EPI_ISL_15800446 | EPI_ISL_15808985 | EPI_ISL_15898779 |
| EPI_ISL_15750066 | EPI_ISL_15800424 | EPI_ISL_15808987 | EPI_ISL_15898785 |
| EPI_ISL_15750072 | EPI_ISL_15800422 | EPI_ISL_15808989 | EPI_ISL_15898782 |
| EPI_ISL_15750079 | EPI_ISL_15776882 | EPI_ISL_15808990 | EPI_ISL_15898780 |
| EPI_ISL_15750087 | EPI_ISL_15776880 | EPI_ISL_15808992 | EPI_ISL_15898770 |
| EPI_ISL_15745056 | EPI_ISL_15776874 | EPI_ISL_15808994 | EPI_ISL_15898776 |
| EPI_ISL_15745057 | EPI_ISL_15776868 | EPI_ISL_15809010 | EPI_ISL_15898756 |
| EPI_ISL_15745064 | EPI_ISL_15778240 | EPI_ISL_15809011 | EPI_ISL_15898747 |
| EPI_ISL_15745074 | EPI_ISL_15778238 | EPI_ISL_15809012 | EPI_ISL_15898735 |
| EPI_ISL_15759019 | EPI_ISL_15778241 | EPI_ISL_15809016 | EPI_ISL_15898739 |
| EPI_ISL_15759003 | EPI_ISL_15781885 | EPI_ISL_15814144 | EPI_ISL_15898742 |
| EPI_ISL_15758991 | EPI_ISL_15781890 | EPI_ISL_15814152 | EPI_ISL_15898710 |
| EPI_ISL_15758988 | EPI_ISL_15781891 | EPI_ISL_15814160 | EPI_ISL_15898672 |
| EPI_ISL_15760338 | EPI_ISL_15781887 | EPI_ISL_15814161 | EPI_ISL_15898676 |
| EPI_ISL_15760263 | EPI_ISL_15781869 | EPI_ISL_15814167 | EPI_ISL_15898654 |
| EPI_ISL_15760252 | EPI_ISL_15781871 | EPI_ISL_16055757 | EPI_ISL_15898646 |
| EPI_ISL_15760248 | EPI_ISL_15796094 | EPI_ISL_16055752 | EPI_ISL_15898633 |
| EPI_ISL_15762576 | EPI_ISL_15796093 | EPI_ISL_15837584 | EPI_ISL_15898611 |
| EPI_ISL_15762574 | EPI_ISL_15796095 | EPI_ISL_15837585 | EPI_ISL_15898617 |
| EPI_ISL_15792059 | EPI_ISL_15796092 | EPI_ISL_15837576 | EPI_ISL_15898619 |
| EPI_ISL_15762566 | EPI_ISL_15796088 | EPI_ISL_15837579 | EPI_ISL_15898574 |
| EPI_ISL_15762525 | EPI_ISL_15796066 | EPI_ISL_15837568 | EPI_ISL_15898567 |
| EPI_ISL_15762524 | EPI_ISL_15796060 | EPI_ISL_15837563 | EPI_ISL_15898555 |
| EPI_ISL_16055802 | EPI_ISL_15796056 | EPI_ISL_15837556 | EPI_ISL_15898542 |
| EPI_ISL_16055794 | EPI_ISL_15796055 | EPI_ISL_15837546 | EPI_ISL_15895369 |
| EPI_ISL_16055785 | EPI_ISL_15790747 | EPI_ISL_15837540 | EPI_ISL_15895348 |
| EPI_ISL_16055771 | EPI_ISL_15790745 | EPI_ISL_15837845 | EPI_ISL_15997980 |
| EPI_ISL_16055768 | EPI_ISL_15790748 | EPI_ISL_15855220 | EPI_ISL_15997972 |

|                  |                  |                  |                  |
|------------------|------------------|------------------|------------------|
| EPI_ISL_15997971 | EPI_ISL_15950003 | EPI_ISL_16017244 | EPI_ISL_16093710 |
| EPI_ISL_15997967 | EPI_ISL_15949994 | EPI_ISL_16017242 | EPI_ISL_16093703 |
| EPI_ISL_15997964 | EPI_ISL_15955384 | EPI_ISL_16017240 | EPI_ISL_16093702 |
| EPI_ISL_15997962 | EPI_ISL_15955390 | EPI_ISL_16017228 | EPI_ISL_16077168 |
| EPI_ISL_15897929 | EPI_ISL_15955385 | EPI_ISL_16017229 | EPI_ISL_16077163 |
| EPI_ISL_15908771 | EPI_ISL_15955373 | EPI_ISL_16017232 | EPI_ISL_16077164 |
| EPI_ISL_15908777 | EPI_ISL_15957771 | EPI_ISL_16017230 | EPI_ISL_16077170 |
| EPI_ISL_15908781 | EPI_ISL_15957756 | EPI_ISL_16018033 | EPI_ISL_16077139 |
| EPI_ISL_15908789 | EPI_ISL_15964540 | EPI_ISL_16018029 | EPI_ISL_16080101 |
| EPI_ISL_15908791 | EPI_ISL_15964541 | EPI_ISL_16018574 | EPI_ISL_16080096 |
| EPI_ISL_15908806 | EPI_ISL_15964522 | EPI_ISL_16018572 | EPI_ISL_16080093 |
| EPI_ISL_15908807 | EPI_ISL_15998901 | EPI_ISL_16018565 | EPI_ISL_16080091 |
| EPI_ISL_15908812 | EPI_ISL_15973010 | EPI_ISL_16018004 | EPI_ISL_16093931 |
| EPI_ISL_15908813 | EPI_ISL_15983068 | EPI_ISL_16017513 | EPI_ISL_16093929 |
| EPI_ISL_15910010 | EPI_ISL_15983071 | EPI_ISL_16017510 | EPI_ISL_16122499 |
| EPI_ISL_15912355 | EPI_ISL_15983076 | EPI_ISL_16020315 | EPI_ISL_16122486 |
| EPI_ISL_15912350 | EPI_ISL_15983077 | EPI_ISL_16020306 | EPI_ISL_16122477 |
| EPI_ISL_15912348 | EPI_ISL_15983078 | EPI_ISL_16020309 | EPI_ISL_16122455 |
| EPI_ISL_15912969 | EPI_ISL_15983079 | EPI_ISL_16020291 | EPI_ISL_16122423 |
| EPI_ISL_15916609 | EPI_ISL_15983100 | EPI_ISL_16020286 | EPI_ISL_16122418 |
| EPI_ISL_15916588 | EPI_ISL_15983105 | EPI_ISL_16020289 | EPI_ISL_16122412 |
| EPI_ISL_15997949 | EPI_ISL_15983790 | EPI_ISL_16020633 | EPI_ISL_16122417 |
| EPI_ISL_15997958 | EPI_ISL_15983785 | EPI_ISL_16036634 | EPI_ISL_16122413 |
| EPI_ISL_15997940 | EPI_ISL_15983779 | EPI_ISL_16036631 | EPI_ISL_16122383 |
| EPI_ISL_15938095 | EPI_ISL_15983774 | EPI_ISL_16052030 | EPI_ISL_16122382 |
| EPI_ISL_15938085 | EPI_ISL_15983758 | EPI_ISL_16052031 | EPI_ISL_16122375 |
| EPI_ISL_15938077 | EPI_ISL_15983753 | EPI_ISL_16052034 | EPI_ISL_16122340 |
| EPI_ISL_15938078 | EPI_ISL_15983738 | EPI_ISL_16052040 | EPI_ISL_16122337 |
| EPI_ISL_15938063 | EPI_ISL_15983727 | EPI_ISL_16052042 | EPI_ISL_16122324 |
| EPI_ISL_15938064 | EPI_ISL_15983726 | EPI_ISL_16052044 | EPI_ISL_16122330 |
| EPI_ISL_15938060 | EPI_ISL_15983722 | EPI_ISL_16052046 | EPI_ISL_16122321 |
| EPI_ISL_15938058 | EPI_ISL_15999321 | EPI_ISL_16052053 | EPI_ISL_16122304 |
| EPI_ISL_15938045 | EPI_ISL_15999318 | EPI_ISL_16052057 | EPI_ISL_16122307 |
| EPI_ISL_15938043 | EPI_ISL_16018036 | EPI_ISL_16052058 | EPI_ISL_16122308 |
| EPI_ISL_15938034 | EPI_ISL_16004457 | EPI_ISL_16052059 | EPI_ISL_16122298 |
| EPI_ISL_15998888 | EPI_ISL_16018035 | EPI_ISL_16052062 | EPI_ISL_16122275 |
| EPI_ISL_15998889 | EPI_ISL_16008315 | EPI_ISL_16052066 | EPI_ISL_16122267 |
| EPI_ISL_15998873 | EPI_ISL_16008310 | EPI_ISL_16055399 | EPI_ISL_16122274 |
| EPI_ISL_15941864 | EPI_ISL_16017263 | EPI_ISL_16093759 | EPI_ISL_16122266 |
| EPI_ISL_15941853 | EPI_ISL_16017256 | EPI_ISL_16093754 | EPI_ISL_16122242 |
| EPI_ISL_15941843 | EPI_ISL_16017250 | EPI_ISL_16093743 | EPI_ISL_16122245 |
| EPI_ISL_16055716 | EPI_ISL_16017249 | EPI_ISL_16093737 | EPI_ISL_16122232 |
| EPI_ISL_16055712 | EPI_ISL_16017246 | EPI_ISL_16093713 | EPI_ISL_16122230 |

|                  |
|------------------|
| EPI_ISL_16122223 |
| EPI_ISL_16122213 |
| EPI_ISL_16122209 |
| EPI_ISL_16122207 |
| EPI_ISL_16122164 |
| EPI_ISL_16122169 |

Table S1. b) GISAID Accession Numbers of SARS-CoV-2 genomes belonging to BQ.1.1 lineage (second dataset)

|                  |                  |                  |                  |
|------------------|------------------|------------------|------------------|
| EPI_ISL_15247559 | EPI_ISL_15479417 | EPI_ISL_15656057 | EPI_ISL_15743869 |
| EPI_ISL_15102759 | EPI_ISL_15479380 | EPI_ISL_15661809 | EPI_ISL_15743862 |
| EPI_ISL_15102635 | EPI_ISL_15479369 | EPI_ISL_15661828 | EPI_ISL_15754178 |
| EPI_ISL_15192446 | EPI_ISL_15482165 | EPI_ISL_15661830 | EPI_ISL_15754177 |
| EPI_ISL_15192442 | EPI_ISL_15482148 | EPI_ISL_15661838 | EPI_ISL_15754176 |
| EPI_ISL_15512708 | EPI_ISL_15482121 | EPI_ISL_15661839 | EPI_ISL_15754168 |
| EPI_ISL_15306908 | EPI_ISL_15482114 | EPI_ISL_15661841 | EPI_ISL_15754162 |
| EPI_ISL_15306905 | EPI_ISL_15494278 | EPI_ISL_15661847 | EPI_ISL_15754159 |
| EPI_ISL_15334115 | EPI_ISL_15630397 | EPI_ISL_15665404 | EPI_ISL_15754163 |
| EPI_ISL_15388731 | EPI_ISL_15630398 | EPI_ISL_15665397 | EPI_ISL_15754157 |
| EPI_ISL_15351975 | EPI_ISL_15630401 | EPI_ISL_15668582 | EPI_ISL_15754150 |
| EPI_ISL_15350927 | EPI_ISL_15630395 | EPI_ISL_15682923 | EPI_ISL_15754148 |
| EPI_ISL_15350930 | EPI_ISL_15630391 | EPI_ISL_15682921 | EPI_ISL_15754152 |
| EPI_ISL_15350932 | EPI_ISL_15630386 | EPI_ISL_15682920 | EPI_ISL_15754151 |
| EPI_ISL_15362790 | EPI_ISL_15630380 | EPI_ISL_15682662 | EPI_ISL_15750042 |
| EPI_ISL_15362744 | EPI_ISL_15630384 | EPI_ISL_15682639 | EPI_ISL_15750049 |
| EPI_ISL_15364990 | EPI_ISL_15630359 | EPI_ISL_15682913 | EPI_ISL_15750069 |
| EPI_ISL_15364370 | EPI_ISL_15537457 | EPI_ISL_15720498 | EPI_ISL_15750071 |
| EPI_ISL_15364365 | EPI_ISL_15537192 | EPI_ISL_15720494 | EPI_ISL_15750074 |
| EPI_ISL_15364361 | EPI_ISL_15537195 | EPI_ISL_15720499 | EPI_ISL_15750077 |
| EPI_ISL_15364916 | EPI_ISL_15537212 | EPI_ISL_15720487 | EPI_ISL_15750083 |
| EPI_ISL_15366524 | EPI_ISL_15537216 | EPI_ISL_15720485 | EPI_ISL_15750084 |
| EPI_ISL_15367187 | EPI_ISL_15537218 | EPI_ISL_15720483 | EPI_ISL_15750085 |
| EPI_ISL_15367196 | EPI_ISL_15541769 | EPI_ISL_15720484 | EPI_ISL_15757813 |
| EPI_ISL_15378463 | EPI_ISL_15541765 | EPI_ISL_15720472 | EPI_ISL_15757807 |
| EPI_ISL_15378462 | EPI_ISL_15630348 | EPI_ISL_15697125 | EPI_ISL_15745049 |
| EPI_ISL_15378461 | EPI_ISL_15630334 | EPI_ISL_15697119 | EPI_ISL_15759009 |
| EPI_ISL_15378460 | EPI_ISL_15612028 | EPI_ISL_15697111 | EPI_ISL_15758987 |
| EPI_ISL_15378459 | EPI_ISL_15612026 | EPI_ISL_15722060 | EPI_ISL_15792068 |
| EPI_ISL_15388706 | EPI_ISL_15612017 | EPI_ISL_15725982 | EPI_ISL_15760337 |
| EPI_ISL_15418142 | EPI_ISL_15611988 | EPI_ISL_15725981 | EPI_ISL_15760331 |
| EPI_ISL_15422144 | EPI_ISL_15545088 | EPI_ISL_15725954 | EPI_ISL_15760329 |
| EPI_ISL_15422135 | EPI_ISL_15545097 | EPI_ISL_15743216 | EPI_ISL_15760327 |
| EPI_ISL_15509833 | EPI_ISL_15545104 | EPI_ISL_15743207 | EPI_ISL_15760322 |
| EPI_ISL_15509816 | EPI_ISL_15573043 | EPI_ISL_15743195 | EPI_ISL_15760265 |

|                  |                  |                  |                  |
|------------------|------------------|------------------|------------------|
| EPI_ISL_15509810 | EPI_ISL_15573037 | EPI_ISL_15743185 | EPI_ISL_15760268 |
| EPI_ISL_15464205 | EPI_ISL_15573031 | EPI_ISL_15743189 | EPI_ISL_15760259 |
| EPI_ISL_15464201 | EPI_ISL_15630319 | EPI_ISL_15743179 | EPI_ISL_15760257 |
| EPI_ISL_15464193 | EPI_ISL_15630318 | EPI_ISL_15743180 | EPI_ISL_15760255 |
| EPI_ISL_15436142 | EPI_ISL_15630301 | EPI_ISL_15743183 | EPI_ISL_15792067 |
| EPI_ISL_15436153 | EPI_ISL_15612391 | EPI_ISL_15731081 | EPI_ISL_15762571 |
| EPI_ISL_15470005 | EPI_ISL_15612386 | EPI_ISL_15731079 | EPI_ISL_15762570 |
| EPI_ISL_15469996 | EPI_ISL_15612375 | EPI_ISL_15731077 | EPI_ISL_15792051 |
| EPI_ISL_15469988 | EPI_ISL_15754185 | EPI_ISL_15731076 | EPI_ISL_15792050 |
| EPI_ISL_15472436 | EPI_ISL_15754180 | EPI_ISL_15731075 | EPI_ISL_15762563 |
| EPI_ISL_15509800 | EPI_ISL_15656061 | EPI_ISL_15743875 | EPI_ISL_15762558 |
| EPI_ISL_16055807 | EPI_ISL_15803229 | EPI_ISL_15814204 | EPI_ISL_15898631 |
| EPI_ISL_15763836 | EPI_ISL_15803207 | EPI_ISL_15814207 | EPI_ISL_15898618 |
| EPI_ISL_16055801 | EPI_ISL_15803199 | EPI_ISL_15837578 | EPI_ISL_15898609 |
| EPI_ISL_16055797 | EPI_ISL_15803200 | EPI_ISL_15837587 | EPI_ISL_15898601 |
| EPI_ISL_16055793 | EPI_ISL_15803194 | EPI_ISL_15837580 | EPI_ISL_15898598 |
| EPI_ISL_16055780 | EPI_ISL_15803192 | EPI_ISL_15837569 | EPI_ISL_15898595 |
| EPI_ISL_16055769 | EPI_ISL_15803193 | EPI_ISL_15837565 | EPI_ISL_15898586 |
| EPI_ISL_16055764 | EPI_ISL_15833146 | EPI_ISL_15837558 | EPI_ISL_15898578 |
| EPI_ISL_16055761 | EPI_ISL_15833145 | EPI_ISL_15837549 | EPI_ISL_15898572 |
| EPI_ISL_16055762 | EPI_ISL_15833142 | EPI_ISL_15837547 | EPI_ISL_15898563 |
| EPI_ISL_15769853 | EPI_ISL_15833141 | EPI_ISL_15837847 | EPI_ISL_15898558 |
| EPI_ISL_15769843 | EPI_ISL_15833140 | EPI_ISL_15837836 | EPI_ISL_15898559 |
| EPI_ISL_15769718 | EPI_ISL_15833136 | EPI_ISL_15837828 | EPI_ISL_15898539 |
| EPI_ISL_15769715 | EPI_ISL_15833137 | EPI_ISL_15855224 | EPI_ISL_15895377 |
| EPI_ISL_15769699 | EPI_ISL_15833133 | EPI_ISL_15855219 | EPI_ISL_15895374 |
| EPI_ISL_15769691 | EPI_ISL_15833129 | EPI_ISL_15997750 | EPI_ISL_15895376 |
| EPI_ISL_15769690 | EPI_ISL_15801526 | EPI_ISL_15997745 | EPI_ISL_15895370 |
| EPI_ISL_15769686 | EPI_ISL_15801521 | EPI_ISL_15997749 | EPI_ISL_15895359 |
| EPI_ISL_15800498 | EPI_ISL_15801522 | EPI_ISL_15997751 | EPI_ISL_15895351 |
| EPI_ISL_15800474 | EPI_ISL_15801525 | EPI_ISL_15997738 | EPI_ISL_15895350 |
| EPI_ISL_15971078 | EPI_ISL_15801510 | EPI_ISL_15997737 | EPI_ISL_15895347 |
| EPI_ISL_15970969 | EPI_ISL_15801501 | EPI_ISL_15997730 | EPI_ISL_15895349 |
| EPI_ISL_15970972 | EPI_ISL_15801502 | EPI_ISL_15997731 | EPI_ISL_15895343 |
| EPI_ISL_15800454 | EPI_ISL_15992129 | EPI_ISL_15997735 | EPI_ISL_15895345 |
| EPI_ISL_15800442 | EPI_ISL_15992135 | EPI_ISL_15997728 | EPI_ISL_15895342 |
| EPI_ISL_15776879 | EPI_ISL_15992124 | EPI_ISL_15997726 | EPI_ISL_15895334 |
| EPI_ISL_15776875 | EPI_ISL_15808980 | EPI_ISL_15839968 | EPI_ISL_15895336 |
| EPI_ISL_15781883 | EPI_ISL_15808988 | EPI_ISL_15839965 | EPI_ISL_15997989 |
| EPI_ISL_15781882 | EPI_ISL_15808999 | EPI_ISL_15839962 | EPI_ISL_15997976 |
| EPI_ISL_15781880 | EPI_ISL_15809000 | EPI_ISL_15877698 | EPI_ISL_15997973 |
| EPI_ISL_15781872 | EPI_ISL_15809013 | EPI_ISL_15898895 | EPI_ISL_15997978 |
| EPI_ISL_15781866 | EPI_ISL_15809014 | EPI_ISL_15898860 | EPI_ISL_15997977 |
| EPI_ISL_15781864 | EPI_ISL_15809017 | EPI_ISL_15898818 | EPI_ISL_15997970 |
| EPI_ISL_15796078 | EPI_ISL_15809019 | EPI_ISL_15898805 | EPI_ISL_15997968 |
| EPI_ISL_15790754 | EPI_ISL_15814463 | EPI_ISL_15898765 | EPI_ISL_15997963 |

|                  |                  |                  |                  |
|------------------|------------------|------------------|------------------|
| EPI_ISL_15790756 | EPI_ISL_15814458 | EPI_ISL_15898688 | EPI_ISL_15897917 |
| EPI_ISL_15790757 | EPI_ISL_15814142 | EPI_ISL_15898678 | EPI_ISL_15897932 |
| EPI_ISL_15790753 | EPI_ISL_15814169 | EPI_ISL_15898667 | EPI_ISL_15897939 |
| EPI_ISL_15790743 | EPI_ISL_15814175 | EPI_ISL_15898665 | EPI_ISL_15908768 |
| EPI_ISL_15790733 | EPI_ISL_15814176 | EPI_ISL_15898668 | EPI_ISL_15908770 |
| EPI_ISL_15790734 | EPI_ISL_15814181 | EPI_ISL_15898664 | EPI_ISL_15908778 |
| EPI_ISL_15790706 | EPI_ISL_15814189 | EPI_ISL_15898655 | EPI_ISL_15908780 |
| EPI_ISL_15790703 | EPI_ISL_15814195 | EPI_ISL_15898652 | EPI_ISL_15908782 |
| EPI_ISL_15790854 | EPI_ISL_15814199 | EPI_ISL_15898632 | EPI_ISL_15908786 |
| EPI_ISL_15803223 | EPI_ISL_15814201 | EPI_ISL_15898643 | EPI_ISL_15908788 |
| EPI_ISL_15803221 | EPI_ISL_15814202 | EPI_ISL_15898629 | EPI_ISL_15908790 |
| EPI_ISL_15908792 | EPI_ISL_15938094 | EPI_ISL_15955381 | EPI_ISL_15983088 |
| EPI_ISL_15908798 | EPI_ISL_15938087 | EPI_ISL_15955368 | EPI_ISL_15983089 |
| EPI_ISL_15908801 | EPI_ISL_15938088 | EPI_ISL_15957762 | EPI_ISL_15983091 |
| EPI_ISL_15908803 | EPI_ISL_15938082 | EPI_ISL_15957757 | EPI_ISL_15983092 |
| EPI_ISL_15908804 | EPI_ISL_15938083 | EPI_ISL_15957750 | EPI_ISL_15983094 |
| EPI_ISL_15908805 | EPI_ISL_15938079 | EPI_ISL_15957758 | EPI_ISL_15983097 |
| EPI_ISL_15908808 | EPI_ISL_15938076 | EPI_ISL_15957749 | EPI_ISL_15983099 |
| EPI_ISL_15908810 | EPI_ISL_15938072 | EPI_ISL_15957735 | EPI_ISL_15983103 |
| EPI_ISL_15908811 | EPI_ISL_15938070 | EPI_ISL_15957736 | EPI_ISL_15983106 |
| EPI_ISL_15908815 | EPI_ISL_15938065 | EPI_ISL_15964538 | EPI_ISL_15983107 |
| EPI_ISL_15908816 | EPI_ISL_15938061 | EPI_ISL_15964537 | EPI_ISL_15983780 |
| EPI_ISL_15910011 | EPI_ISL_15938059 | EPI_ISL_15964533 | EPI_ISL_15983778 |
| EPI_ISL_15909999 | EPI_ISL_15938057 | EPI_ISL_15964531 | EPI_ISL_15983768 |
| EPI_ISL_15912357 | EPI_ISL_15938052 | EPI_ISL_15964532 | EPI_ISL_15983761 |
| EPI_ISL_15912354 | EPI_ISL_15938044 | EPI_ISL_15964527 | EPI_ISL_15983771 |
| EPI_ISL_15912347 | EPI_ISL_15938035 | EPI_ISL_15998923 | EPI_ISL_15983769 |
| EPI_ISL_15912346 | EPI_ISL_15938030 | EPI_ISL_15998929 | EPI_ISL_15983762 |
| EPI_ISL_15912981 | EPI_ISL_15938031 | EPI_ISL_15998917 | EPI_ISL_15983750 |
| EPI_ISL_15912975 | EPI_ISL_15938029 | EPI_ISL_15998913 | EPI_ISL_15983744 |
| EPI_ISL_15912973 | EPI_ISL_15998890 | EPI_ISL_15998921 | EPI_ISL_15983741 |
| EPI_ISL_15912967 | EPI_ISL_15998887 | EPI_ISL_15998907 | EPI_ISL_15983736 |
| EPI_ISL_15916607 | EPI_ISL_15998882 | EPI_ISL_15998911 | EPI_ISL_15983742 |
| EPI_ISL_15916611 | EPI_ISL_15998878 | EPI_ISL_15998910 | EPI_ISL_15983734 |
| EPI_ISL_15916608 | EPI_ISL_15998877 | EPI_ISL_15998909 | EPI_ISL_15983728 |
| EPI_ISL_15916612 | EPI_ISL_15998874 | EPI_ISL_15998898 | EPI_ISL_15983740 |
| EPI_ISL_15916600 | EPI_ISL_15998872 | EPI_ISL_15998900 | EPI_ISL_15983732 |
| EPI_ISL_15916605 | EPI_ISL_15998868 | EPI_ISL_15998897 | EPI_ISL_16018040 |
| EPI_ISL_15916604 | EPI_ISL_15998869 | EPI_ISL_15998896 | EPI_ISL_15983719 |
| EPI_ISL_15916602 | EPI_ISL_15998866 | EPI_ISL_15998893 | EPI_ISL_15983720 |
| EPI_ISL_15916603 | EPI_ISL_15998860 | EPI_ISL_15998891 | EPI_ISL_15983716 |
| EPI_ISL_15916598 | EPI_ISL_15941866 | EPI_ISL_15971250 | EPI_ISL_15999330 |
| EPI_ISL_15916599 | EPI_ISL_15941863 | EPI_ISL_15973003 | EPI_ISL_15999332 |
| EPI_ISL_15916594 | EPI_ISL_15941870 | EPI_ISL_15972999 | EPI_ISL_15999325 |
| EPI_ISL_15916601 | EPI_ISL_15941868 | EPI_ISL_15972998 | EPI_ISL_15999326 |
| EPI_ISL_15997959 | EPI_ISL_15941857 | EPI_ISL_15972996 | EPI_ISL_15999320 |

|                  |                  |                  |                  |
|------------------|------------------|------------------|------------------|
| EPI_ISL_15997948 | EPI_ISL_15941851 | EPI_ISL_15972995 | EPI_ISL_15999319 |
| EPI_ISL_15997951 | EPI_ISL_15941852 | EPI_ISL_15972994 | EPI_ISL_15999316 |
| EPI_ISL_15997953 | EPI_ISL_15941849 | EPI_ISL_15983064 | EPI_ISL_15999312 |
| EPI_ISL_15997947 | EPI_ISL_15941846 | EPI_ISL_15983070 | EPI_ISL_15999309 |
| EPI_ISL_15997944 | EPI_ISL_16055706 | EPI_ISL_15983072 | EPI_ISL_15999308 |
| EPI_ISL_15997943 | EPI_ISL_16055702 | EPI_ISL_15983073 | EPI_ISL_16003262 |
| EPI_ISL_15997937 | EPI_ISL_15950020 | EPI_ISL_15983074 | EPI_ISL_16003260 |
| EPI_ISL_15997936 | EPI_ISL_15950008 | EPI_ISL_15983075 | EPI_ISL_16004464 |
| EPI_ISL_15938091 | EPI_ISL_15950004 | EPI_ISL_15983082 | EPI_ISL_16004459 |
| EPI_ISL_15938090 | EPI_ISL_15949996 | EPI_ISL_15983085 | EPI_ISL_16008333 |
| EPI_ISL_15938097 | EPI_ISL_15949995 | EPI_ISL_15983087 | EPI_ISL_16008336 |
| EPI_ISL_16008332 | EPI_ISL_16017647 | EPI_ISL_16055377 | EPI_ISL_16080102 |
| EPI_ISL_16008335 | EPI_ISL_16020312 | EPI_ISL_16055378 | EPI_ISL_16082199 |
| EPI_ISL_16008325 | EPI_ISL_16020313 | EPI_ISL_16055374 | EPI_ISL_16093925 |
| EPI_ISL_16008328 | EPI_ISL_16020316 | EPI_ISL_16055698 | EPI_ISL_16093924 |
| EPI_ISL_16008323 | EPI_ISL_16020307 | EPI_ISL_16055691 | EPI_ISL_16093922 |
| EPI_ISL_16008318 | EPI_ISL_16020303 | EPI_ISL_16055690 | EPI_ISL_16093914 |
| EPI_ISL_16008320 | EPI_ISL_16020294 | EPI_ISL_16093760 | EPI_ISL_16093919 |
| EPI_ISL_16008313 | EPI_ISL_16020292 | EPI_ISL_16093751 | EPI_ISL_16093915 |
| EPI_ISL_16017262 | EPI_ISL_16020288 | EPI_ISL_16093752 | EPI_ISL_16093912 |
| EPI_ISL_16017265 | EPI_ISL_16020287 | EPI_ISL_16093746 | EPI_ISL_16093911 |
| EPI_ISL_16017258 | EPI_ISL_16020284 | EPI_ISL_16093742 | EPI_ISL_16093909 |
| EPI_ISL_16017251 | EPI_ISL_16020283 | EPI_ISL_16093738 | EPI_ISL_16093935 |
| EPI_ISL_16017247 | EPI_ISL_16020281 | EPI_ISL_16093735 | EPI_ISL_16122503 |
| EPI_ISL_16017245 | EPI_ISL_16020282 | EPI_ISL_16093733 | EPI_ISL_16122497 |
| EPI_ISL_16017231 | EPI_ISL_16020628 | EPI_ISL_16093732 | EPI_ISL_16122494 |
| EPI_ISL_16017225 | EPI_ISL_16020630 | EPI_ISL_16093729 | EPI_ISL_16122489 |
| EPI_ISL_16017227 | EPI_ISL_16020635 | EPI_ISL_16093727 | EPI_ISL_16122485 |
| EPI_ISL_16017226 | EPI_ISL_16020636 | EPI_ISL_16093724 | EPI_ISL_16122475 |
| EPI_ISL_16017224 | EPI_ISL_16020640 | EPI_ISL_16093717 | EPI_ISL_16122458 |
| EPI_ISL_16017221 | EPI_ISL_16020642 | EPI_ISL_16093716 | EPI_ISL_16122452 |
| EPI_ISL_16017219 | EPI_ISL_16020650 | EPI_ISL_16093709 | EPI_ISL_16122449 |
| EPI_ISL_16017211 | EPI_ISL_16036633 | EPI_ISL_16093701 | EPI_ISL_16122446 |
| EPI_ISL_16017208 | EPI_ISL_16052032 | EPI_ISL_16093699 | EPI_ISL_16122441 |
| EPI_ISL_16017202 | EPI_ISL_16052033 | EPI_ISL_16093700 | EPI_ISL_16122444 |
| EPI_ISL_16017203 | EPI_ISL_16052035 | EPI_ISL_16093698 | EPI_ISL_16122431 |
| EPI_ISL_16017200 | EPI_ISL_16052037 | EPI_ISL_16093695 | EPI_ISL_16122428 |
| EPI_ISL_16018031 | EPI_ISL_16052038 | EPI_ISL_16093696 | EPI_ISL_16122419 |
| EPI_ISL_16018575 | EPI_ISL_16052039 | EPI_ISL_16093692 | EPI_ISL_16122410 |
| EPI_ISL_16018577 | EPI_ISL_16052047 | EPI_ISL_16093694 | EPI_ISL_16122400 |
| EPI_ISL_16018568 | EPI_ISL_16052060 | EPI_ISL_16077171 | EPI_ISL_16122389 |
| EPI_ISL_16018567 | EPI_ISL_16052061 | EPI_ISL_16077167 | EPI_ISL_16122366 |
| EPI_ISL_16018564 | EPI_ISL_16052065 | EPI_ISL_16077169 | EPI_ISL_16122365 |
| EPI_ISL_16018559 | EPI_ISL_16055404 | EPI_ISL_16077162 | EPI_ISL_16122363 |
| EPI_ISL_16018558 | EPI_ISL_16055411 | EPI_ISL_16077166 | EPI_ISL_16122359 |
| EPI_ISL_16018560 | EPI_ISL_16055401 | EPI_ISL_16077159 | EPI_ISL_16122356 |



|                  |                  |                  |                  |
|------------------|------------------|------------------|------------------|
| EPI_ISL_16018553 | EPI_ISL_16055402 | EPI_ISL_16077157 | EPI_ISL_16122346 |
| EPI_ISL_16018550 | EPI_ISL_16055397 | EPI_ISL_16077155 | EPI_ISL_16122329 |
| EPI_ISL_16018554 | EPI_ISL_16055393 | EPI_ISL_16077153 | EPI_ISL_16122326 |
| EPI_ISL_16018555 | EPI_ISL_16055394 | EPI_ISL_16077149 | EPI_ISL_16122331 |
| EPI_ISL_16018551 | EPI_ISL_16055392 | EPI_ISL_16077148 | EPI_ISL_16122332 |
| EPI_ISL_16018548 | EPI_ISL_16055391 | EPI_ISL_16077144 | EPI_ISL_16122328 |
| EPI_ISL_16018549 | EPI_ISL_16055389 | EPI_ISL_16077142 | EPI_ISL_16122325 |
| EPI_ISL_16018547 | EPI_ISL_16055388 | EPI_ISL_16077140 | EPI_ISL_16122319 |
| EPI_ISL_16017515 | EPI_ISL_16055386 | EPI_ISL_16077136 | EPI_ISL_16122320 |
| EPI_ISL_16017512 | EPI_ISL_16055381 | EPI_ISL_16080104 | EPI_ISL_16122296 |
| EPI_ISL_16017500 | EPI_ISL_16055379 | EPI_ISL_16080099 | EPI_ISL_16122293 |
| EPI_ISL_16122282 |                  |                  |                  |
| EPI_ISL_16122258 |                  |                  |                  |
| EPI_ISL_16122236 |                  |                  |                  |
| EPI_ISL_16122233 |                  |                  |                  |
| EPI_ISL_16122238 |                  |                  |                  |
| EPI_ISL_16122208 |                  |                  |                  |
| EPI_ISL_16122200 |                  |                  |                  |
| EPI_ISL_16122161 |                  |                  |                  |
| EPI_ISL_16122156 |                  |                  |                  |
