# Supplementary material for: Selective Pressure and Evolution of SARS-CoV-2 Lineages BF.7 and BQ.1.1 Circulating in Italy from July to December 2022
Source: MDPI journal article supplement (doi:10.3390/microorganisms12050908), 2024-04-30
Supplement: s1 [file s1]

**Table S2.** Selective pressure analysis on SARS-CoV-2 lineages BF.7 and BQ.1.1

|                                                      | <i>nsp1 (BF.7)</i>                              | <i>nsp1 (BQ.1.1)</i>         |
|------------------------------------------------------|-------------------------------------------------|------------------------------|
| Positively selected sites<br>(w for sites > 1) HYPHY | /                                               | /                            |
| Negatively selected sites<br>(w for sites < 1) HYPHY | /                                               | 85 (M,V)                     |
|                                                      | <i>nsp2 (BF.7)</i>                              | <i>nsp2 (BQ.1.1)</i>         |
| Positively selected sites<br>(w for sites > 1) HYPHY | /                                               | /                            |
| Negatively selected sites<br>(w for sites < 1) HYPHY | 630 (N)                                         | /                            |
|                                                      | <i>nsp3 (BF.7)</i>                              | <i>nsp3 (BQ.1.1)</i>         |
| Positively selected sites<br>(w for sites > 1) HYPHY | 180 (Q, H); 1329 (N; D)                         | /                            |
| Negatively selected sites<br>(w for sites < 1) HYPHY | 135 (D); 1445 (C); 1591 (C); 1594 (C); 1603 (V) | 79 (L); 460 (F); 1741 (L; F) |
|                                                      | <i>nsp4 (BF.7)</i>                              | <i>nsp4 (BQ.1.1)</i>         |
| Positively selected sites<br>(w for sites > 1) HYPHY | /                                               | /                            |
| Negatively selected sites<br>(w for sites < 1) HYPHY | 290 (V)                                         | 223 (H); 290 (V)             |
|                                                      | <i>nsp5 (BF.7)</i>                              | <i>nsp5 (BQ.1.1)</i>         |
| Positively selected sites<br>(w for sites > 1) HYPHY | /                                               | /                            |
| Negatively selected sites<br>(w for sites < 1) HYPHY | 48 (D); 216 (D)                                 | /                            |
|                                                      | <i>nsp6 (BF.7)</i>                              | <i>nsp6 (BQ.1.1)</i>         |
| Positively selected sites<br>(w for sites > 1) HYPHY | /                                               | /                            |

|                                                      |                            |                              |
|------------------------------------------------------|----------------------------|------------------------------|
| Negatively selected sites<br>(w for sites < 1) HYPHY | 133 (D)                    | /                            |
| <hr/>                                                |                            |                              |
|                                                      | <b><i>nsp7 (BF.7)</i></b>  | <b><i>nsp7 (BQ.1.1)</i></b>  |
| Positively selected sites<br>(w for sites > 1) HYPHY | /                          | /                            |
| Negatively selected sites<br>(w for sites < 1) HYPHY | /                          | /                            |
| <hr/>                                                |                            |                              |
|                                                      | <b><i>nsp8 (BF.7)</i></b>  | <b><i>nsp8 (BQ.1.1)</i></b>  |
| Positively selected sites<br>(w for sites > 1) HYPHY | /                          | /                            |
| Negatively selected sites<br>(w for sites < 1) HYPHY | /                          | /                            |
| <hr/>                                                |                            |                              |
|                                                      | <b><i>nsp9 (BF.7)</i></b>  | <b><i>nsp9 (BQ.1.1)</i></b>  |
| Positively selected sites<br>(w for sites > 1) HYPHY | /                          | /                            |
| Negatively selected sites<br>(w for sites < 1) HYPHY | /                          | 105 (S)                      |
| <hr/>                                                |                            |                              |
|                                                      | <b><i>nsp10 (BF.7)</i></b> | <b><i>nsp10 (BQ.1.1)</i></b> |
| Positively selected sites<br>(w for sites > 1) HYPHY | /                          | /                            |
| Negatively selected sites<br>(w for sites < 1) HYPHY | 113 (K)                    | /                            |
| <hr/>                                                |                            |                              |
|                                                      | <b><i>nsp11 (BF.7)</i></b> | <b><i>nsp11 (BQ.1.1)</i></b> |
| Positively selected sites<br>(w for sites > 1) HYPHY | /                          | /                            |
| Negatively selected sites<br>(w for sites < 1) HYPHY | /                          | /                            |
| <hr/>                                                |                            |                              |
|                                                      | <b><i>nsp12 (BF.7)</i></b> | <b><i>nsp12 (BQ.1.1)</i></b> |
| Positively selected sites                            | /                          | /                            |

|                                                      |                                               |                              |
|------------------------------------------------------|-----------------------------------------------|------------------------------|
| (w for sites > 1) HYPHY                              |                                               |                              |
| Negatively selected sites<br>(w for sites < 1) HYPHY | 105 ( R )                                     | /                            |
| <hr/>                                                |                                               |                              |
|                                                      | <b><i>nsp13 (BF.7)</i></b>                    | <b><i>nsp13 (BQ.1.1)</i></b> |
| Positively selected sites<br>(w for sites > 1) HYPHY | /                                             | /                            |
| Negatively selected sites<br>(w for sites < 1) HYPHY | 128 (E); 202 (K); 390 (R); 462 (K); 560 ( R ) | /                            |
| <hr/>                                                |                                               |                              |
|                                                      | <b><i>nsp14 (BF.7)</i></b>                    | <b><i>nsp14 (BQ.1.1)</i></b> |
| Positively selected sites<br>(w for sites > 1) HYPHY | /                                             | /                            |
| Negatively selected sites<br>(w for sites < 1) HYPHY | 41 (D); 53 (R); 485 ( R )                     | /                            |
| <hr/>                                                |                                               |                              |
|                                                      | <b><i>nsp15 (BF.7)</i></b>                    | <b><i>nsp15 (BQ.1.1)</i></b> |
| Positively selected sites<br>(w for sites > 1) HYPHY | /                                             | /                            |
| Negatively selected sites<br>(w for sites < 1) HYPHY | /                                             | 79 (I); 218 (M, T); 230 (Y)  |
| <hr/>                                                |                                               |                              |
|                                                      | <b><i>nsp16 (BF.7)</i></b>                    | <b><i>nsp16 (BQ.1.1)</i></b> |
| Positively selected sites<br>(w for sites > 1) HYPHY | /                                             | /                            |
| Negatively selected sites<br>(w for sites < 1) HYPHY | 2 (S); 7 (P)                                  | 7 (P); 199 (A)               |
| <hr/>                                                |                                               |                              |
|                                                      | <b><i>ORF3a (BF.7)</i></b>                    | <b><i>ORF3a (BQ.1.1)</i></b> |
| Positively selected sites<br>(w for sites > 1) HYPHY | /                                             | /                            |
| Negatively selected sites<br>(w for sites < 1) HYPHY | /                                             | 130 ( C )                    |
| <hr/>                                                |                                               |                              |
|                                                      | <b><i>E (BF.7)</i></b>                        | <b><i>E (BQ.1.1)</i></b>     |

|                                                      |                  |                              |
|------------------------------------------------------|------------------|------------------------------|
| Positively selected sites<br>(w for sites > 1) HYPHY | /                | /                            |
| Negatively selected sites<br>(w for sites < 1) HYPHY | /                | /                            |
| <b><i>M (BF.7)</i></b>                               |                  | <b><i>M (BQ.1.1)</i></b>     |
| Positively selected sites<br>(w for sites > 1) HYPHY | /                | /                            |
| Negatively selected sites<br>(w for sites < 1) HYPHY | /                | /                            |
| <b><i>N (BF.7)</i></b>                               |                  | <b><i>N (BQ.1.1)</i></b>     |
| Positively selected sites<br>(w for sites > 1) HYPHY | /                | /                            |
| Negatively selected sites<br>(w for sites < 1) HYPHY | 158 (V); 309 (P) | /                            |
| <b><i>ORF6 (BF.7)</i></b>                            |                  | <b><i>ORF6 (BQ.1.1)</i></b>  |
| Positively selected sites<br>(w for sites > 1) HYPHY | /                | /                            |
| Negatively selected sites<br>(w for sites < 1) HYPHY | /                | /                            |
| <b><i>ORF7a (BF.7)</i></b>                           |                  | <b><i>ORF7a (BQ.1.1)</i></b> |
| Positively selected sites<br>(w for sites > 1) HYPHY | /                | /                            |
| Negatively selected sites<br>(w for sites < 1) HYPHY | 79 (A)           | /                            |
| <b><i>ORF7b (BF.7)</i></b>                           |                  | <b><i>ORF7b (BQ.1.1)</i></b> |
| Positively selected sites<br>(w for sites > 1) HYPHY | /                | /                            |
| Negatively selected sites<br>(w for sites < 1) HYPHY | /                | /                            |

|                                                      | <b><i>ORF8 (BF.7)</i></b>             | <b><i>ORF8 (BQ.1.1)</i></b>  |
|------------------------------------------------------|---------------------------------------|------------------------------|
| Positively selected sites<br>(w for sites > 1) HYPHY | /                                     | 121 (I; L; T)                |
| Negatively selected sites<br>(w for sites < 1) HYPHY | /                                     | /                            |
| <hr/>                                                |                                       |                              |
|                                                      | <b><i>ORF10 (BF.7)</i></b>            | <b><i>ORF10 (BQ.1.1)</i></b> |
| Positively selected sites<br>(w for sites > 1) HYPHY | /                                     | /                            |
| Negatively selected sites<br>(w for sites < 1) HYPHY | /                                     | /                            |
| <hr/>                                                |                                       |                              |
|                                                      | <b><i>Spike (BF.7)</i></b>            | <b><i>Spike (BQ.1.1)</i></b> |
| Positively selected sites<br>(w for sites > 1) HYPHY | 408 (R, S); 440 (N; K)                | 452 (L; R)                   |
| Negatively selected sites<br>(w for sites < 1) HYPHY | 138 (D); 146 (H, Y); 508 (Y); 619 (E) | 457 (R); 1216 (I)            |
| <hr/>                                                |                                       |                              |
